# Supplementary material
Source: MDPI journal article supplement (https://www.mdpi.com/2311-7524/7/7/165)
Supplement: s1 [file s1]

## Article

# Supplementary Materials: Seed set patterns in East African Highland Cooking bananas are dependent on weather before, during and after pollination

Allan Waniale, Rony Swennen, Settumba B. Mukasa, Arthur K. Tugume, Jerome Kubiriba, Wilberforce K. Tushemereirwe, Michael Batte, Allan Brown and Robooni Tumuhimbise

**Table S1.** Correlation coefficients between daily weather attributes at the time of pollination of ‘Enzirabahima,’ ‘Mshale’ and ‘Nshonowa’ with ‘Calcutta 4’ from January 2016 to January 2019 (n= 704)

|                  | T@3pm     | T@9am     | T2M       | T2MMax    | T2MMin    | T2MRNG    | TS        | Sol. Rad. | RF       | RH@9am   | RH@3pm   |
|------------------|-----------|-----------|-----------|-----------|-----------|-----------|-----------|-----------|----------|----------|----------|
| <b>T@9am</b>     | 0.178***  | -         |           |           |           |           |           |           |          |          |          |
| <b>T2M</b>       | 0.895***  | 0.140***  | -         |           |           |           |           |           |          |          |          |
| <b>T2MMax</b>    | 0.889***  | 0.040     | 0.977***  | -         |           |           |           |           |          |          |          |
| <b>T2MMin</b>    | 0.728***  | 0.295***  | 0.864***  | 0.752***  | -         |           |           |           |          |          |          |
| <b>T2MRNG</b>    | 0.778***  | -0.125*** | 0.816***  | 0.916***  | 0.424***  | -         |           |           |          |          |          |
| <b>TS</b>        | 0.861***  | 0.101**   | 0.984***  | 0.969***  | 0.838***  | 0.820***  | -         |           |          |          |          |
| <b>Sol. Rad.</b> | 0.854***  | 0.089*    | 0.696***  | 0.699***  | 0.536***  | 0.634***  | 0.651***  | -         |          |          |          |
| <b>RF</b>        | -0.259*** | 0.010     | -0.280*** | -0.286*** | -0.235*** | -0.249*** | -0.225*** | -0.170*** | -        |          |          |
| <b>RH@9am</b>    | -0.240*** | 0.196***  | -0.112**  | -0.117**  | -0.087*   | -0.108**  | -0.067    | -0.348*** | 0.337*** | -        |          |
| <b>RH@3pm</b>    | -0.646*** | -0.117*** | -0.601*** | -0.627*** | -0.450*** | -0.587*** | -0.552*** | -0.625*** | 0.270*** | 0.306*** | -        |
| <b>RH2M</b>      | -0.708*** | 0.233***  | -0.785*** | -0.842*** | -0.548*** | -0.823*** | -0.770*** | -0.600*** | 0.484*** | 0.255*** | 0.554*** |

\*P<0.05, \*\*P<0.01, \*\*\*P<0.001, T@3pm – Temperature at 3pm, T@9am – Temperature at 9am, T2M – Average temperature at 2 meters, T2MMax – Maximum temperature at 2 meters, T2MMin – Minimum temperature at 2 meters, T2MRNG – Temperature range at 2 meters, TS – Earth skin temperature, Sol. Rad. – Solar radiation, RF – Rainfall, RH@9am – Relative humidity at 9am, RH@3pm – Relative humidity at 3pm, and RH2M – Relative humidity at 2 meters.

**Table S2.** Correlation coefficients of weather attributes and seed set adjusted to 100 fruits per bunch at 15 day intervals between 105 and 15 days before pollination in ‘Enzirabahima,’ ‘Mshale’ and ‘Nshonowa’ pollinated with ‘Calcutta 4’ between January 2016 and January 2019

|                | DBP | T@3pm    | T@9am    | T2M      | T2MMax   | T2MMin   | T2MRNG   | TS       | Sol. Rad. | RF      | RH@9am | RH@3pm    | RH2M      | n   |
|----------------|-----|----------|----------|----------|----------|----------|----------|----------|-----------|---------|--------|-----------|-----------|-----|
| ‘Enzirabahima’ | 105 | -0.116   | -0.039   | -0.106   | -0.092   | -0.137   | -0.045   | -0.083   | -0.018    | 0.075   | 0.134  | 0.033     | 0.083     | 174 |
| ‘Mshale’       | 105 | -0.052   | -0.031   | -0.058   | -0.073   | -0.063   | -0.068   | -0.067   | 0.080     | 0.004   | -0.048 | 0.072     | 0.055     | 90  |
| ‘Nshonowa’     | 105 | 0.011    | 0.070    | 0.004    | -0.032   | -0.060   | -0.012   | -0.009   | 0.214*    | 0.072   | -0.017 | 0.129     | 0.065     | 100 |
| ‘Enzirabahima’ | 90  | -0.088   | 0.006    | -0.056   | -0.034   | -0.110   | 0.035    | -0.029   | -0.005    | 0.042   | 0.062  | -0.076    | 0.023     | 174 |
| ‘Mshale’       | 90  | -0.028   | -0.076   | 0.005    | 0.032    | -0.056   | 0.082    | 0.009    | 0.041     | -0.040  | -0.096 | -0.027    | -0.112    | 90  |
| ‘Nshonowa’     | 90  | 0.055    | -0.136   | 0.133    | 0.158    | -0.075   | 0.234**  | 0.139    | 0.055     | 0.102   | 0.060  | -0.072    | -0.120    | 100 |
| ‘Enzirabahima’ | 75  | -0.006   | 0.028    | 0.041    | 0.048    | -0.030   | 0.078    | 0.056    | -0.006    | -0.071  | 0.023  | -0.064    | -0.018    | 174 |
| ‘Mshale’       | 75  | 0.177    | -0.165   | 0.142    | 0.211*   | -0.060   | 0.315**  | 0.147    | 0.180     | -0.134  | -0.016 | -0.191    | -0.205    | 90  |
| ‘Nshonowa’     | 75  | 0.278**  | -0.093   | 0.340*** | 0.368*** | 0.116    | 0.413*** | 0.335*** | 0.206*    | -0.214* | 0.073  | -0.290**  | -0.328*** | 100 |
| ‘Enzirabahima’ | 60  | -0.044   | 0.037    | 0.000    | 0.027    | -0.087   | 0.093    | 0.011    | -0.042    | 0.035   | 0.022  | -0.094    | -0.010    | 174 |
| ‘Mshale’       | 60  | 0.147    | -0.283** | 0.263*   | 0.314**  | 0.147    | 0.360*** | 0.247*   | 0.121     | -0.002  | -0.001 | -0.049    | -0.368*** | 90  |
| ‘Nshonowa’     | 60  | 0.334*** | -0.198*  | 0.389*** | 0.456*** | 0.120    | 0.513*** | 0.387*** | 0.249*    | -0.048  | 0.149  | -0.371*** | -0.438*** | 100 |
| ‘Enzirabahima’ | 45  | 0.031    | 0.038    | 0.063    | 0.108    | -0.100   | 0.200**  | 0.054    | 0.188*    | -0.057  | 0.051  | -0.247**  | -0.096    | 174 |
| ‘Mshale’       | 45  | 0.161    | -0.224*  | 0.184    | 0.280**  | -0.030   | 0.394*** | 0.213*   | 0.105     | -0.037  | 0.200  | -0.098    | -0.290**  | 90  |
| ‘Nshonowa’     | 45  | 0.319**  | -0.190   | 0.325*** | 0.413*** | 0.051    | 0.508*** | 0.323    | 0.182     | -0.042  | 0.225* | -0.349*** | -0.426*** | 100 |
| ‘Enzirabahima’ | 30  | 0.016    | 0.112    | 0.071    | 0.089    | 0.003    | 0.114    | 0.066    | 0.060     | 0.071   | 0.183* | -0.133    | -0.019    | 174 |
| ‘Mshale’       | 30  | 0.196    | -0.097   | 0.383*** | 0.395*** | 0.326**  | 0.348*** | 0.399*** | 0.052     | -0.179  | -0.029 | -0.087    | -0.393*** | 90  |
| ‘Nshonowa’     | 30  | 0.279**  | -0.173   | 0.365*** | 0.410*** | 0.267**  | 0.415*** | 0.386*** | 0.115     | -0.225* | 0.010  | -0.361*** | -0.413*** | 100 |
| ‘Enzirabahima’ | 15  | 0.196**  | 0.149*   | 0.196**  | 0.172*   | 0.179*   | 0.125    | 0.172*   | 0.192*    | -0.077  | -0.122 | -0.294*** | -0.111    | 174 |
| ‘Mshale’       | 15  | 0.445*** | 0.164    | 0.421*** | 0.404*** | 0.433*** | 0.330**  | 0.414*** | 0.161     | -0.200  | 0.000  | -0.160    | -0.373*** | 90  |
| ‘Nshonowa’     | 15  | 0.488*** | 0.121    | 0.487*** | 0.488*** | 0.492*** | 0.406*** | 0.482*** | 0.236*    | -0.074  | -0.038 | -0.307**  | -0.434*** | 100 |

\*P<0.05, \*\*P<0.01, \*\*\*P<0.001, DBP – days before pollination, T@3pm – Temperature at 3pm, T@9am – Temperature at 9am, T2M – Average temperature at 2 meters, T2MMax – Maximum temperature at 2 meters, T2MMin – Minimum temperature at 2 meters, T2MRNG – Temperature range at 2 meters, TS – Earth skin temperature, Sol. Rad. – Solar radiation, RF – Rainfall, RH@9am – Relative humidity at 9am, RH@3pm – Relative humidity at 3pm, RH2M – Relative humidity at 2 meters, and n – Number of observations

**Table S3.** Correlation coefficients of weather attributes and seed set adjusted to 100 fruits per bunch at 15 day intervals between 0 and 120 days after pollination in ‘Enzirabahima,’ ‘Mshale’ and ‘Nshonowa’ pollinated with ‘Calcutta 4’ between January 2016 and January 2019

|                | DAP | T@3pm     | T@9am     | T2M       | T2MMax    | T2MMin  | T2MRNG    | TS        | Sol. Rad. | RF      | RH@9am  | RH@3pm    | RH2M     | n   |
|----------------|-----|-----------|-----------|-----------|-----------|---------|-----------|-----------|-----------|---------|---------|-----------|----------|-----|
| ‘Enzirabahima’ | 0   | 0.210**   | 0.122     | 0.214**   | 0.207**   | 0.204** | 0.148     | 0.187*    | 0.181*    | -0.001  | -0.071  | -0.260*** | -0.154*  | 174 |
| ‘Mshale’       | 0   | 0.074     | 0.148     | 0.120     | 0.129     | 0.121   | 0.105     | 0.209*    | -0.029    | 0.139   | 0.265*  | 0.132     | -0.020   | 90  |
| ‘Nshonowa’     | 0   | 0.030     | -0.063    | 0.201*    | 0.214*    | 0.210*  | 0.166     | 0.266**   | -0.099    | 0.057   | 0.129   | 0.025     | -0.151   | 100 |
| ‘Enzirabahima’ | 15  | 0.085     | 0.123     | 0.139     | 0.121     | 0.143   | 0.078     | 0.139     | 0.052     | 0.035   | -0.016  | -0.165*   | -0.003   | 174 |
| ‘Mshale’       | 15  | -0.054    | 0.202     | -0.011    | -0.036    | -0.006  | -0.054    | 0.006     | -0.061    | 0.034   | 0.149   | 0.132     | 0.088    | 90  |
| ‘Nshonowa’     | 15  | -0.186    | 0.152     | -0.111    | -0.131    | -0.078  | -0.141    | -0.061    | -0.330*** | 0.049   | 0.323** | 0.269**   | 0.229*   | 100 |
| ‘Enzirabahima’ | 30  | 0.027     | 0.150*    | 0.079     | 0.068     | 0.078   | 0.046     | 0.082     | 0.043     | 0.118   | 0.015   | -0.170*   | 0.020    | 174 |
| ‘Mshale’       | 30  | -0.011    | 0.360***  | -0.094    | -0.105    | -0.071  | -0.118    | -0.080    | 0.011     | 0.149   | 0.122   | 0.145     | 0.208*   | 90  |
| ‘Nshonowa’     | 30  | -0.163    | 0.337***  | -0.104    | -0.128    | -0.026  | -0.177    | -0.077    | -0.249*   | 0.023   | 0.150   | 0.260**   | 0.231*   | 100 |
| ‘Enzirabahima’ | 45  | 0.073     | 0.209**   | 0.042     | 0.029     | 0.085   | -0.020    | 0.021     | 0.068     | 0.080   | -0.007  | -0.164*   | 0.083    | 174 |
| ‘Mshale’       | 45  | -0.134    | 0.113     | -0.200    | -0.208*   | -0.212* | -0.174    | -0.211*   | -0.109    | 0.298** | 0.116   | 0.298**   | 0.324**  | 90  |
| ‘Nshonowa’     | 45  | -0.269**  | 0.219*    | -0.292**  | -0.304**  | -0.233* | -0.322**  | -0.288**  | -0.273**  | 0.265** | 0.301** | 0.411***  | 0.395*** | 100 |
| ‘Enzirabahima’ | 60  | 0.000     | 0.183*    | 0.059     | 0.018     | 0.153*  | -0.091    | 0.029     | 0.019     | 0.066   | 0.011   | -0.045    | 0.071    | 174 |
| ‘Mshale’       | 60  | -0.250*   | 0.024     | -0.213*   | -0.237*   | -0.173  | -0.228*   | -0.223*   | -0.207    | 0.144   | 0.238*  | 0.341**   | 0.278**  | 90  |
| ‘Nshonowa’     | 60  | -0.272**  | 0.288**   | -0.296**  | -0.333*** | -0.178  | -0.403*** | -0.326*** | -0.201*   | 0.012   | 0.276** | 0.250*    | 0.404*** | 100 |
| ‘Enzirabahima’ | 75  | -0.050    | 0.175*    | -0.072    | -0.072    | -0.018  | -0.094    | -0.070    | -0.097    | 0.057   | 0.028   | -0.006    | 0.165*   | 174 |
| ‘Mshale’       | 75  | -0.210*   | 0.168     | -0.191    | -0.181    | -0.188  | -0.141    | -0.193    | -0.215*   | -0.095  | 0.231*  | 0.333**   | 0.237*   | 90  |
| ‘Nshonowa’     | 75  | -0.275**  | 0.239*    | -0.340*** | -0.344*** | -0.250* | -0.367*** | -0.366*** | -0.328*** | -0.112  | 0.179   | 0.277**   | 0.409*** | 100 |
| ‘Enzirabahima’ | 90  | -0.087    | 0.126     | -0.019    | -0.041    | 0.060   | -0.108    | -0.024    | -0.067    | -0.074  | 0.003   | -0.056    | 0.111    | 159 |
| ‘Mshale’       | 90  | -0.063    | -0.005    | -0.064    | -0.028    | -0.160  | 0.089     | -0.110    | -0.067    | -0.175  | -0.067  | 0.100     | -0.096   | 81  |
| ‘Nshonowa’     | 90  | -0.293**  | 0.106     | -0.307**  | -0.333**  | -0.203  | -0.383*** | -0.364*** | -0.317**  | -0.027  | 0.042   | 0.264*    | 0.291**  | 93  |
| ‘Mshale’       | 105 | -0.064    | 0.145     | -0.091    | -0.079    | -0.069  | -0.074    | -0.111    | -0.165    | -0.068  | 0.109   | 0.154     | -0.043   | 81  |
| ‘Nshonowa’     | 105 | -0.236*   | 0.096     | -0.304**  | -0.297**  | -0.253* | -0.283**  | -0.341*** | -0.196    | -0.121  | -0.027  | 0.122     | 0.091    | 93  |
| ‘Mshale’       | 120 | -0.032    | -0.133    | -0.001    | 0.071     | -0.105  | 0.182     | -0.014    | -0.185    | -0.115  | 0.219   | 0.060     | -0.187   | 81  |
| ‘Nshonowa’     | 120 | -0.340*** | -0.336*** | -0.277**  | -0.256*   | -0.240* | -0.210*   | -0.276**  | -0.347*** | -0.005  | 0.127   | 0.188     | -0.005   | 93  |

\*P<0.05, \*\*P<0.01, \*\*\*P<0.001, DAP – days after pollination, T@3pm – Temperature at 3pm, T@9am – Temperature at 9am, T2M – Average temperature at 2 meters, T2MMax – Maximum temperature at 2 meters, T2MMin – Minimum temperature at 2 meters, T2MRNG – Temperature range at 2 meters, TS – Earth skin temperature, Sol. Rad. – Solar radiation, RF – Rainfall, RH@9am – Relative humidity at 9am, RH@3pm – Relative humidity at 3pm, RH2M – Relative humidity at 2 meters, and n – Number of observations.



**Table S4.** Analysis of variance means squares of a multiple linear regression with bunch size as groups of seed set adjusted to 100 fruits per bunch regressed on weather attributes between 105 days before pollination and 60 days after pollination for ‘Enzirabahima,’ ‘Mshale’ and ‘Nshonowa’ pollinated with ‘Calcutta 4’ between January 2016 and January 2019

| Source         | 105 DBP        |            |            | 90 DBP         |           |            |
|----------------|----------------|------------|------------|----------------|-----------|------------|
|                | ‘Enzirabahima’ | ‘Mshale’   | ‘Nshonowa’ | ‘Enzirabahima’ | ‘Mshale’  | ‘Nshonowa’ |
| Regression     | 42.0           | 2,993.1*** | 258.4***   | 45.1*          | 3182.4*** | 261.1***   |
| Residual       | 32.7           | 759.7      | 67.3       | 31.1           | 605.3     | 67.9       |
| Change         | 37.9           | 2,705.9*** | 161.4**    | 46.8           | 3393.9*** | 241.2***   |
| r <sup>2</sup> | 8.6            | 56.9       | 64.6       | 12.8           | 65.7      | 64.3       |
| Source         | 75 DBP         |            |            | 60 DBP         |           |            |
|                | ‘Enzirabahima’ | ‘Mshale’   | ‘Nshonowa’ | ‘Enzirabahima’ | ‘Mshale’  | ‘Nshonowa’ |
| Regression     | 35.8           | 3036.3***  | 260.4***   | 51.1**         | 3210.1*** | 259.1***   |
| Residual       | 35.7           | 724.5      | 69.1       | 28.2           | 582.6     | 65.9       |
| Change         | 36.3           | 2741.8***  | 222.2***   | 52.2**         | 2947.9*** | 210.7***   |
| r <sup>2</sup> | 0.1            | 58.9       | 63.6       | 21.1           | 67.0      | 65.3       |
| Source         | 45 DBP         |            |            | 30 DBP         |           |            |
|                | ‘Enzirabahima’ | ‘Mshale’   | ‘Nshonowa’ | ‘Enzirabahima’ | ‘Mshale’  | ‘Nshonowa’ |
| Regression     | 51.1**         | 3103.0***  | 284.8***   | 49.1*          | 3171.9*** | 256.9***   |
| Residual       | 28.2           | 670.0      | 27.1       | 29.2           | 613.8     | 69.9       |
| Change         | 37.4           | 2606.8***  | 197.0***   | 45.3*          | 2771.7*** | 209.6***   |
| r <sup>2</sup> | 21.1           | 62.0       | 85.7       | 18.4           | 65.2      | 63.3       |
| Source         | 15 DBP         |            |            | 0 DAP          |           |            |
|                | ‘Enzirabahima’ | ‘Mshale’   | ‘Nshonowa’ | ‘Enzirabahima’ | ‘Mshale’  | ‘Nshonowa’ |
| Regression     | 44.9           | 3172.6***  | 285.9***   | 56.6***        | 3067.3*** | 265.3***   |
| Residual       | 31.2           | 613.2      | 17.8       | 25.5           | 699.2     | 54.9       |
| Change         | 36.9           | 1894.9***  | 209.0***   | 56.7***        | 2462.7*** | 202.7***   |
| r <sup>2</sup> | 12.7           | 65.2       | 90.7       | 28.7           | 60.4      | 71.1       |
| Source         | 15 DAP         |            |            | 30 DAP         |           |            |
|                | ‘Enzirabahima’ | ‘Mshale’   | ‘Nshonowa’ | ‘Enzirabahima’ | ‘Mshale’  | ‘Nshonowa’ |
| Regression     | 43.6           | 2935.6***  | 266.5***   | 45.3*          | 3158.7*** | 263.4***   |
| Residual       | 31.9           | 806.7      | 52.6       | 31.0           | 624.5     | 58.2       |
| Change         | 40.0           | 3012.7***  | 192.1***   | 33.5           | 2898.6*** | 203.0***   |
| r <sup>2</sup> | 10.8           | 54.3       | 72.3       | 13.2           | 64.6      | 69.4       |
| Source         | 45 DAP         |            |            | 60 DAP         |           |            |
|                | ‘Enzirabahima’ | ‘Mshale’   | ‘Nshonowa’ | ‘Enzirabahima’ | ‘Mshale’  | ‘Nshonowa’ |
| Regression     | 46.7*          | 3234.6***  | 263.5***   | 50.8**         | 3128.3    | 263.5***   |
| Residual       | 30.4           | 562.6      | 58.0       | 28.4           | 649.3     | 58.1       |
| Change         | 41.3           | 2972.3***  | 224.7***   | 45.0*          | 3071.9    | 201.3***   |
| r <sup>2</sup> | 15.0           | 68.1       | 69.5       | 20.6           | 63.2      | 69.5       |

\*P<0.05, \*\*P<0.01, \*\*\*P<0.001, DBP – days before pollination, DAP - days after pollination, and r<sup>2</sup> – Percentage variability accounted for by the regression model

**Table S5.** Analysis of variance means squares of a multiple linear regression with bunch size as groups of seed set adjusted to 100 fruits per bunch regressed on weather attributes between 75 and 120 days after pollination for ‘Enzirabahima,’ ‘Mshale’ and ‘Nshonowa’ pollinated with ‘Calcutta 4’ between January 2016 and January 2019

| Source         | 75 DAP         |           |            | 90 DAP         |           |            |
|----------------|----------------|-----------|------------|----------------|-----------|------------|
|                | ‘Enzirabahima’ | ‘Mshale’  | ‘Nshonowa’ | ‘Enzirabahima’ | ‘Mshale’  | ‘Nshonowa’ |
| Regression     | 46.9*          | 3053.4*** | 263.2***   | 46.9*          | 3293.9*** | 280.9***   |
| Residual       | 30.3           | 710.5     | 58.6       | 30.4           | 550.4     | 35.9       |
| Change         | 44.4           | 2770.4*** | 205.6*     | 43.0           | 3259.1*** | 235.2***   |
| r <sup>2</sup> | 15.3           | 59.7      | 69.2       | 16.2           | 71.4      | 82.3       |

  

| Source         | 105 DAP   |            | 120 DAP   |            |
|----------------|-----------|------------|-----------|------------|
|                | ‘Mshale’  | ‘Nshonowa’ | ‘Mshale’  | ‘Nshonowa’ |
| Regression     | 3360.8*** | 225.4      | 3266.7*** | 251.5**    |
| Residual       | 483.4     | 156.8      | 577.6     | 98.8       |
| Change         | 2688.3*** | 159.8      | 2644.9*** | 227.8*     |
| r <sup>2</sup> | 74.9      | 22.7       | 70.0      | 51.3       |

\*P<0.05, \*\*P<0.01, \*\*\*P<0.001, DAP - days after pollination, and r<sup>2</sup> – Percentage variability accounted for by the regression model

**Table S6.** Analysis of variance degrees of freedom of a multiple linear regression with bunch size as groups of seed set adjusted to 100 fruits per bunch regressed on weather attributes between 105 days before pollination and 120 days after pollination at 15 day intervals for ‘Enzirabahima,’ ‘Mshale’ and ‘Nshonowa’ pollinated with ‘Calcutta 4’ between January 2016 and January 2019

| Source     | 105 DBP – 75 DAP |          |            | 90 – 120 DAP   |          |            |
|------------|------------------|----------|------------|----------------|----------|------------|
|            | ‘Enzirabahima’   | ‘Mshale’ | ‘Nshonowa’ | ‘Enzirabahima’ | ‘Mshale’ | ‘Nshonowa’ |
| Regression | 56               | 40       | 63         | 55             | 40       | 62         |
| Residual   | 114              | 49       | 35         | 100            | 40       | 29         |
| Change     | -40              | -23      | -45        | -39            | -23      | -44        |

DBP – days before pollination, DAP - days after pollination

**Table S7.** Accumulated analysis of variance mean squares of a multiple linear regression with bunch size as groups of seed set adjusted to 100 fruits per bunch regressed on weather attributes 105 and 90 days before pollination for ‘Enzirabahima,’ ‘Mshale’ and ‘Nshonowa’ pollinated with ‘Calcutta 4’ between January 2016 and January 2019

| Change              | 105 DBP        |            |            | 90 DBP         |            |            |
|---------------------|----------------|------------|------------|----------------|------------|------------|
|                     | ‘Enzirabahima’ | ‘Mshale’   | ‘Nshonowa’ | ‘Enzirabahima’ | ‘Mshale’   | ‘Nshonowa’ |
| T@3PM               | 182.2*         | 7382.7**   | 907.6***   | 107.9          | 1602.0     | 7.5        |
| T@9AM               | 4.8            | 165.7      | 301.4*     | 0.2            | 390.2      | 360.0*     |
| RF                  | 1.9            | 228.8      | 28.0       | 1.4            | 401.3      | 235.3      |
| RH2M                | 1.5            | 604.3      | 69.9       | 45.4           | 6654.5**   | 32.6       |
| RH@3PM              | 22.1           | 2032.6     | 676.9**    | 71.4           | 5.9        | 9.4        |
| RH@9AM              | 199.9*         | 97.4       | 0.7        | 12.6           | 586.3      | 51.2       |
| Sol. Rad.           | 3.4            | 991.2      | 851.2**    | 1.0            | 261.2      | 52.8       |
| T2MMax              | 0.1            | 886.6      | 297.9*     | 6.1            | 20.0       | 278.4      |
| T2MMin              | 2.2            | 4174.0*    | 3377.2***  | 2.1            | 3729.9*    | 465.3*     |
| T2MRNG              | 3.7            | 1167.4     | 475.6*     | 19.0           | 494.3      | 1655.4***  |
| T2M                 | 1.6            | 1506.2     | 391.0*     | 4.4            | 709.7      | 1406.1***  |
| TS                  | 51.6           | 922.0      | 566.5**    | 135.6.*        | 876.7      | 17.9       |
| Bunch size          | 90.3*          | 7465.9***  | 178.3*     | 61.7           | 6700.6***  | 167.2*     |
| T@3PM.Bunch size    | 50.6           | 9237.9***  | 106.2      | 49.0           | 596.1      | 40.5       |
| T@9AM.Bunch size    | 24.1           | 1796.0     | 123.7      | 48.9           | 3767.9**   | 169.5      |
| RF.Bunch size       | 19.2           | 488.2      | 267.9**    | 28.1           | 1039.9     | 299.5**    |
| RH2M.Bunch size     | 19.9           | 14573.1*** | 368.3**    | 20.2           | 6691.9***  | 93.8       |
| RH@3PM.Bunch size   | 21.7           | 372.0      | 81.5       | 40.1           | 700.8      | 82.7       |
| RH@9AM.Bunch size   | 103.1*         | 313.0      | 116.3      | 87.4*          | 3350.9**   | 47.5       |
| Sol. Rad.Bunch size | 2.4            | 1716.7     | 43.5       | 28.2           | 2281.1**   | 79.7       |
| T2MMax.Bunch size   | 74.7           | 118.5      | 129.7      | 30.9           | 13773.4*** | 316.0**    |
| T2MMin.Bunch size   | 13.1           | 493.5      | 142.9      | 137.3**        | 3704.0**   | 569.0***   |
| T2MRNG.Bunch size   | 15.3           | 1.1        | 266.9*     | 31.2           | 1047.0     | 171.1      |
| T2M.Bunch size      | 101.7*         | 290.4      | 150.5      | 7.6            | 637.9      | 1217.6***  |
| TS.Bunch size       | 30.2           | 496.3      | 214.5*     | 59.0           | 0.4        | 150.8      |
| Residual            | 32.7           | 759.7      | 67.3       | 31.1           | 605.3      | 67.9       |

\*P<0.05, \*\*P<0.01, \*\*\*P<0.001, T@3pm – Temperature at 3pm, T@9am – Temperature at 9am, RF – Rainfall, RH2M – Relative humidity at 2 meters, RH@3pm – Relative humidity at 3pm, RH@9am – Relative humidity at 9am, Sol. Rad. – Solar radiation, T2MMax – Maximum temperature at 2 meters, T2MMin – Minimum temperature at 2 meters, T2MRNG – Temperature range at 2 meters, T2M – Average temperature at 2 meters, TS – Earth skin temperature, and DBP – days before pollination

**Table S8.** Accumulated analysis of variance mean squares of a multiple linear regression with bunch size as groups of seed set adjusted to 100 fruits per bunch regressed on weather attributes 75 and 60 days before pollination for ‘Enzirabahima,’ ‘Mshale’ and ‘Nshonowa’ pollinated with ‘Calcutta 4’ between January 2016 and January 2019

| Change              | 75 DBP         |            |            | 60 DBP         |            |            |
|---------------------|----------------|------------|------------|----------------|------------|------------|
|                     | ‘Enzirabahima’ | ‘Mshale’   | ‘Nshonowa’ | ‘Enzirabahima’ | ‘Mshale’   | ‘Nshonowa’ |
| T@3PM               | 0.8            | 4911.2*    | 1432.9***  | 14.4           | 3371.3*    | 2068.9***  |
| T@9AM               | 5.1            | 3985.2*    | 371.9*     | 8.3            | 13692.7*** | 673.3**    |
| RF                  | 40.4           | 1259.9     | 477.7*     | 1.9            | 282.0      | 0.2        |
| RH2M                | 6.3            | 211.0      | 25.5       | 68.1           | 9336.3***  | 1396.3***  |
| RH@3PM              | 19.8           | 19.0       | 68.2       | 87.4           | 3245.9*    | 173.7      |
| RH@9AM              | 5.1            | 5500.1**   | 1019.6***  | 12.7           | 3077.7*    | 985.4***   |
| Sol. Rad.           | 2.3            | 1481.2     | 52.1       | 33.5           | 362.2      | 73.8       |
| T2M                 | 66.8           | 1801.8     | 24.3       | 4.7            | 190.2      | 14.9       |
| T2MMax              | 4.2            | 7995.0**   | 338.2*     | 140.1*         | 3691.4*    | 453.8*     |
| T2MMin              | 127.5          | 1235.2     | 557.7**    | 152.0*         | 6.8        | 56.8       |
| T2MRNG              | 65.5           | 2847.6     | 739.9**    | 26.2           | 112.0      | 122.2      |
| TS                  | 5.5            | 485.5      | 154.8      | 5.0            | 6381.1**   | 37.5       |
| Bunch size          | 51.1           | 5331.4***  | 184.1*     | 54.8           | 3370.5***  | 131.1      |
| MaxT.Bunch size     | 31.4           | 989.4      | 44.8       | 49.6           | 904.1      | 85.5       |
| MinT.Bunch size     | 12.3           | 1459.9     | 193.6*     | 34.3           | 1531.8     | 79.4       |
| RF.Bunch size       | 10.0           | 447.5      | 281.4**    | 30.4           | 506.1      | 51.5       |
| RH2M.Bunch size     | 50.3           | 4451.6**   | 210.1*     | 18.2           | 7144.4***  | 209.6*     |
| RH@3PM.Bunch size   | 89.4           | 572.0      | 205.8*     | 32.1           | 1437.9     | 80.3       |
| RH@9AM.Bunch size   | 102.5*         | 18790.8*** | 35.9       | 36.2           | 12882.3*** | 29.2       |
| Sol. Rad.Bunch size | 5.5            | 234.3      | 14.7       | 145.0**        | 2939.4*    | 350.4**    |
| T2M.Bunch size      | 22.6           | 873.9      | 234.4*     | 25.0           | 2107.0*    | 595.5***   |
| T2MMax.Bunch size   | 31.1           | 1657.4     | 135.4      | 179.3***       | 2628.6*    | 59.6       |
| T2MMin.Bunch size   | 13.5           | 1624.4     | 359.3**    | 38.9           | 475.9      | 589.6***   |
| T2MRNG.Bunch size   | 25.5           | 496.4      | 1136.8**   | 43.4           | 1153.2     | 375.7**    |
| TS.Bunch size       | 32.0           | 9.2        | 285.5*     | 23.1           | 200.0      | 385.1**    |
| Residual            | 35.7           | 724.5      | 69.1       | 28.2           | 582.6      | 65.9       |

\*P<0.05, \*\*P<0.01, \*\*\*P<0.001, T@3pm – Temperature at 3pm, T@9am – Temperature at 9am, RF – Rainfall, RH2M – Relative humidity at 2 meters, RH@3pm – Relative humidity at 3pm, RH@9am – Relative humidity at 9am, Sol. Rad. – Solar radiation, T2MMax – Maximum temperature at 2 meters, T2MMin – Minimum temperature at 2 meters, T2MRNG – Temperature range at 2 meters, T2M – Average temperature at 2 meters, TS – Earth skin temperature, and DBP – days before pollination



**Table S9.** Accumulated analysis of variance mean squares of a multiple linear regression with bunch size as groups of seed set adjusted to 100 fruits per bunch regressed on weather attributes 45 and 30 days before pollination for ‘Enzirabahima,’ ‘Mshale’ and ‘Nshonowa’ pollinated with ‘Calcutta 4’ between January 2016 and January 2019

| Change              | 45 DBP         |            |            | 30 DBP         |            |            |
|---------------------|----------------|------------|------------|----------------|------------|------------|
|                     | ‘Enzirabahima’ | ‘Mshale’   | ‘Nshonowa’ | ‘Enzirabahima’ | ‘Mshale’   | ‘Nshonowa’ |
| T@3PM               | 4.5            | 4070.6*    | 1893.8***  | 1.3            | 6043.1**   | 1447.8***  |
| T@9AM               | 5.4            | 7945.6**   | 736.3***   | 69.4           | 1714.1     | 819.0**    |
| RF                  | 19.3           | 670.8      | 1.1        | 32.8           | 4605.8**   | 438.0*     |
| RH2M                | 111.4*         | 1852.6     | 1453.5***  | 104.4          | 19251.5*** | 504.9*     |
| RH@3PM              | 443.9***       | 1822.1     | 205.6**    | 159.3*         | 537.2      | 307.4*     |
| RH@9AM              | 80.4           | 17929.4*** | 1822.6***  | 200.4*         | 1946.6     | 314.5*     |
| Sol. Rad.           | 373.0***       | 231.0      | 168.4*     | 30.5           | 3488.8*    | 62.9       |
| T2M                 | 12.7           | 4644.6*    | 1248.2***  | 0.2            | 4161.3*    | 46.4       |
| T2MMax              | 75.5           | 9415.3***  | 83.6       | 41.5           | 45.7       | 787.0**    |
| T2MMin              | 21.2           | 192.0      | 89.2       | 0.1            | 443.5      | 518.3*     |
| T2MRNG              | 6.7            | 27.1       | 0.5        | 44.2           | 1.0        | 254.0      |
| TS                  | 5.8            | 71.2       | 22.2       | 2.9            | 1038.4     | 110.6      |
| Bunch size          | 51.2           | 3058.5**   | 210.9***   | 71.1           | 1375.3     | 47.3       |
| MaxT.Bunch size     | 18.0           | 945.2      | 91.4*      | 71.7           | 6028.9***  | 366.9**    |
| MinT.Bunch size     | 29.1           | 1511.9     | 126.7**    | 63.2           | 3970.3***  | 190.9*     |
| RF.Bunch size       | 20.3           | 558.1      | 176.1***   | 35.1           | 6125.8***  | 231.5*     |
| RH2M.Bunch size     | 54.2           | 10705.7*** | 150.4**    | 78.1           | 2612.4*    | 216.6*     |
| RH@3PM.Bunch size   | 73.5*          | 1767.0     | 336.9***   | 15.1           | 471.2      | 124.4      |
| RH@9AM.Bunch size   | 79.4*          | 5284.5**   | 63.9       | 62.0           | 4667.1**   | 42.1       |
| Sol. Rad.Bunch size | 41.9           | 830.5      | 177.6**    | 34.3           | 4567.2**   | 144.2      |
| T2M.Bunch size      | 24.5           | 6712.2***  | 695.6***   | 31.2           | 3081.0*    | 52.9       |
| T2MMax.Bunch size   | 47.4           | 228.0      | 261.7***   | 44.3           | 999.9      | 143.5      |
| T2MMin.Bunch size   | 20.5           | 168.4      | 245.7***   | 27.6           | 265.9      | 317.9**    |
| T2MRNG.Bunch size   | 24.1           | 728.3      | 50.5       | 0.3            | 88.0       | 831.8***   |
| TS.Bunch size       | 1.9            | 83.7       | 73.3       | 42.7           | 786.1      | 64.8       |
| Residual            | 28.2           | 670.0      | 27.1       | 29.2           | 613.8      | 69.9       |

\*P<0.05, \*\*P<0.01, \*\*\*P<0.001, T@3pm – Temperature at 3pm, T@9am – Temperature at 9am, RF – Rainfall, RH2M – Relative humidity at 2 meters, RH@3pm – Relative humidity at 3pm, RH@9am – Relative humidity at 9am, Sol. Rad. – Solar radiation, T2MMax – Maximum temperature at 2 meters, T2MMin – Minimum temperature at 2 meters, T2MRNG – Temperature range at 2 meters, T2M – Average temperature at 2 meters, TS – Earth skin temperature, and DBP – days before pollination

**Table S10.** Accumulated analysis of variance mean squares of a multiple linear regression with bunch size as groups of seed set adjusted to 100 fruits per bunch regressed on weather attributes 15 before pollination and zero days after pollination (time of pollination) for ‘Enzirabahima,’ ‘Mshale’ and ‘Nshonowa’ pollinated with ‘Calcutta 4’ between January 2016 and January 2019

| Change              | 15 DBP         |            |            | 0 DAP          |            |            |
|---------------------|----------------|------------|------------|----------------|------------|------------|
|                     | ‘Enzirabahima’ | ‘Mshale’   | ‘Nshonowa’ | ‘Enzirabahima’ | ‘Mshale’   | ‘Nshonowa’ |
| T@3PM               | 228.0**        | 31081.1*** | 4428.7***  | 238.3**        | 20.0       | 2.6        |
| T@9AM               | 78.7           | 798.5      | 61.1       | 116.0*         | 2499.3     | 26.9       |
| RF                  | 29.3           | 4438.9*    | 11.8       | 12.2           | 3921.3*    | 764.4***   |
| RH2M                | 6.9            | 6497.4**   | 725.1*     | 46.3           | 3135.2*    | 237.7*     |
| RH@3PM              | 245.2**        | 978.0      | 104.8*     | 152.0*         | 1631.2     | 50.4       |
| RH@9AM              | 31.4           | 2103.4     | 40.1       | 12.5           | 7149.5**   | 23.8       |
| Sol. Rad.           | 0.0            | 8331.7***  | 1049.3***  | 18.9           | 3645.3*    | 1895.1***  |
| T2M                 | 61.7           | 3863.4*    | 25.0       | 7.9            | 740.0      | 429.8**    |
| T2MMax              | 32.1           | 7820.2***  | 3.9        | 0.2            | 75.8       | 15.1       |
| T2MMin              | 59.9           | 464.5      | 929.5***   | 7.2            | 272.1      | 35.6       |
| T2MRNG              | 1.5            | 2982.0*    | 0.4        | 30.9           | 1542.2     | 627.3**    |
| TS                  | 2.9            | 1143.2     | 65.5       | 7.4            | 24162.6*** | 1680.0***  |
| Bunch size          | 65.7           | 2563.9**   | 193.5***   | 63.9*          | 3451.4***  | 300.0***   |
| H2M.Bunch size      | 44.6           | 2566.1*    | 371.7***   | 98.9**         | 966.1      | 55.7       |
| MaxT.Bunch size     | 33.7           | 4701.1***  | 245.5***   | 167.4***       | 1178.5     | 45.6       |
| MinT.Bunch size     | 42.4           | 22.1       | 41.4       | 83.2*          | 239.8      | 370.3***   |
| RF.Bunch size       | 121.3**        | 1709.8     | 81.5**     | 35.1           | 559.3      | 151.9*     |
| RH@3PM.Bunch size   | 46.2           | 622.8      | 245.5***   | 33.0           | 1522.4     | 131.4      |
| RH@9AM.Bunch size   | 23.7           | 6379.8***  | 474.8***   | 92.3*          | 687.8      | 6.4        |
| Sol. Rad.Bunch size | 32.9           | 620.9      | 338.3***   | 18.0           | 1617.1     | 998.7***   |
| T2M.Bunch size      | 18.7           | 132.0      | 60.6*      | 14.6           | 18273.1*** | 7.1        |
| T2MMax.Bunch size   | 6.9            | 113.3      | 108.5**    | 36.5           | 1231.0     | 211.3*     |
| T2MMin.Bunch size   | 13.2           | 235.9      | 178.8***   | 33.0           | 1947.6     | 104.5      |
| T2MRNG.Bunch size   | 18.4           | 70.4       | 157.6***   | 2.7            | 7.3        | 162.5*     |
| TS.Bunch size       | 0.3            | 138.1      | 297.3***   | 2.8            | 204.3      | 368.1**    |
| Residual            | 31.2           | 613.2      | 17.8       | 25.5           | 699.2      | 54.9       |

\*P<0.05, \*\*P<0.01, \*\*\*P<0.001, T@3pm – Temperature at 3pm, T@9am – Temperature at 9am, RF – Rainfall, RH2M – Relative humidity at 2 meters, RH@3pm – Relative humidity at 3pm, RH@9am – Relative humidity at 9am, Sol. Rad. – Solar radiation, T2MMax – Maximum temperature at 2 meters, T2MMin – Minimum temperature at 2 meters, T2MRNG – Temperature range at 2 meters, T2M – Average temperature at 2 meters, TS – Earth skin temperature, DBP – days before pollination, and DAP – days after pollination

**Table S11.** Accumulated analysis of variance mean squares of a multiple linear regression with bunch size as groups of seed set adjusted to 100 fruits per bunch regressed on weather attributes 15 and 30 days after pollination for ‘Enzirabahima,’ ‘Mshale’ and ‘Nshonowa’ pollinated with ‘Calcutta 4’ between January 2016 and January 2019

| Change              | 15 DAP         |            |            | 30 DAP         |            |            |
|---------------------|----------------|------------|------------|----------------|------------|------------|
|                     | ‘Enzirabahima’ | ‘Mshale’   | ‘Nshonowa’ | ‘Enzirabahima’ | ‘Mshale’   | ‘Nshonowa’ |
| T@3PM               | 43.2           | 451.8      | 678.2**    | 2.9            | 20.2       | 495.5**    |
| T@9AM               | 82.2           | 7699.2**   | 573.3**    | 139.6*         | 24241.1*** | 2311.9***  |
| RF                  | 15.2           | 28.3       | 0.0        | 96.5           | 3811.8*    | 9.4        |
| RH2M                | 0.2            | 766.0      | 83.2       | 68.0           | 7.7        | 5.7        |
| RH@3PM              | 129.4*         | 1256.6     | 345.6*     | 313.4**        | 377.1      | 444.0**    |
| RH@9AM              | 20.9           | 938.1      | 1564.2***  | 60.3           | 1.1        | 240.9      |
| Sol. Rad.           | 2.1            | 2296.8     | 1254.9***  | 52.3           | 1717.0     | 163.5      |
| T2M                 | 206.2*         | 2247.5     | 463.7**    | 53.9           | 1953.8     | 268.3*     |
| T2MMax              | 0.9            | 246.5      | 153.9      | 0.8            | 26.3       | 156.6      |
| T2MMin              | 18.2           | 2631.8     | 210.3      | 145.3*         | 827.4      | 139.4      |
| T2MRNG              | 5.8            | 6663.3**   | 208.3      | 9.2            | 210.6      | 1849.3***  |
| TS                  | 0.1            | 2400.3     | 676.2**    | 4.9            | 1013.5     | 221.0      |
| Bunch size          | 79.4*          | 4101.0***  | 322.7***   | 62.6           | 5094.7***  | 192.5*     |
| MaxT.Bunch size     | 53.9           | 944.9      | 158.4*     | 9.6            | 1933.1*    | 141.5*     |
| MinT.Bunch size     | 103.3*         | 1818.7     | 138.7*     | 81.5*          | 9023.6***  | 106.4      |
| RF.Bunch size       | 32.3           | 4716.4**   | 48.8       | 31.1           | 5239.1***  | 53.2       |
| RH2M.Bunch size     | 16.8           | 19037.5*** | 8.7        | 13.1           | 299.7      | 40.5       |
| RH@3PM.Bunch size   | 27.1           | 829.8      | 141.2*     | 22.2           | 1702.5     | 284.1**    |
| RH@9AM.Bunch size   | 21.6           | 1399.3     | 154.8*     | 20.8           | 9781.3***  | 52.4       |
| Sol. Rad.Bunch size | 2.8            | 1197.9     | 96.6       | 17.1           | 2580.1*    | 939.6***   |
| T2M.Bunch size      | 71.2           | 395.2      | 416.7***   | 65.8           | 436.3      | 41.9       |
| T2MMax.Bunch size   | 29.3           | 574.4      | 167.2*     | 55.9           | 58.2       | 169.3*     |
| T2MMin.Bunch size   | 72.5           | 483.5      | 130.3      | 52.9           | 14.1       | 432.5***   |
| T2MRNG.Bunch size   | 20.6           | 4161.4*    | 162.1*     | 20.3           | 540.8      | 152.7      |
| TS.Bunch size       | 10.6           | 929.0      | 924.4***   | 11.2           | 138.9      | 351.9**    |
| Residual            | 31.9           | 806.7      | 52.6       | 31.0           | 624.5      | 58.2       |

\*P<0.05, \*\*P<0.01, \*\*\*P<0.001, T@3pm – Temperature at 3pm, T@9am – Temperature at 9am, RF – Rainfall, RH2M – Relative humidity at 2 meters, RH@3pm – Relative humidity at 3pm, RH@9am – Relative humidity at 9am, Sol. Rad. – Solar radiation, T2MMax – Maximum temperature at 2 meters, T2MMin – Minimum temperature at 2 meters, T2MRNG – Temperature range at 2 meters, T2M – Average temperature at 2 meters, TS – Earth skin temperature, and DAP – days after pollination

**Table S12.** Accumulated analysis of variance mean squares of a multiple linear regression with bunch size as groups of seed set adjusted to 100 fruits per bunch regressed on weather attributes 45 and 60 days after pollination for ‘Enzirabahima,’ ‘Mshale’ and ‘Nshonowa’ pollinated with ‘Calcutta 4’ between January 2016 and January 2019

| Change              | 45 DAP         |            |            | 60 DAP         |            |            |
|---------------------|----------------|------------|------------|----------------|------------|------------|
|                     | ‘Enzirabahima’ | ‘Mshale’   | ‘Nshonowa’ | ‘Enzirabahima’ | ‘Mshale’   | ‘Nshonowa’ |
| T@3PM               | 2.9            | 1087.0     | 85.7       | 4.0            | 3104.0*    | 652.7**    |
| T@9AM               | 269.3**        | 7955.3***  | 1928.6***  | 211.0**        | 2615.2     | 2493.5***  |
| RF                  | 15.4           | 10655.1*** | 481.0**    | 7.8            | 1538.1     | 8.8        |
| RH2M                | 24.3           | 1219.4     | 47.5       | 2.8            | 757.3      | 823.9***   |
| RH@3PM              | 168.5*         | 4209.0**   | 843.7***   | 85.9           | 7914.3**   | 28.1       |
| RH@9AM              | 16.6           | 6570.5**   | 11.2       | 7.4            | 694.5      | 815.5***   |
| Sol. Rad.           | 26.9           | 1855.2     | 1383.6***  | 1.1            | 6730.8**   | 760.1***   |
| T2MMax              | 18.1           | 82.1       | 113.1      | 44.1           | 1192.5     | 62.7       |
| T2MMin              | 7.3            | 70.1       | 45.3       | 176.8*         | 83.1       | 193.5      |
| T2MN                | 14.1           | 557.1      | 94.7       | 0.4            | 443.1      | 19.2       |
| T2MRNG              | 49.9           | 3230.6*    | 130.2      | 0.3            | 937.0      | 615.9**    |
| TS                  | 82.0           | 5044.8**   | 118.9      | 197.2*         | 6747.4**   | 56.1       |
| Bunch size          | 66.3           | 3697.0***  | 201.5**    | 76.3*          | 4344.7***  | 168.9*     |
| T@3PM.Bunch size    | 3.4            | 8341.7***  | 75.5       | 123.6**        | 6330.5***  | 22.7       |
| T@9AM.Bunch size    | 152.2***       | 756.8      | 27.9       | 81.5*          | 3200.4*    | 38.3       |
| RF.Bunch size       | 31.9           | 15282.0*** | 192.1*     | 21.9           | 11784.2*** | 71.7       |
| RH2M.Bunch size     | 26.7           | 2757.4*    | 10.8       | 27.0           | 1818.5     | 108.5      |
| RH@3PM.Bunch size   | 7.5            | 500.8      | 20.5       | 4.9            | 706.4      | 1831.1***  |
| RH@9AM.Bunch size   | 53.9           | 18.0       | 81.6       | 16.0           | 4119.8**   | 153.2      |
| Sol. Rad.Bunch size | 91.1*          | 921.1      | 82.5       | 7.9            | 1361.2     | 63.1       |
| T2MMax.Bunch size   | 5.5            | 2195.8*    | 140.6      | 90.2*          | 2644.6*    | 270.4**    |
| T2MMin.Bunch size   | 21.4           | 891.7      | 841.3***   | 50.3           | 1185.2     | 189.1*     |
| T2MN.Bunch size     | 25.7           | 1306.2     | 249.5*     | 25.4           | 134.8      | 49.7       |
| T2MRNG.Bunch size   | 26.5           | 661.5      | 604.0***   | 2.1            | 249.9      | 27.4       |
| TS.Bunch size       | 12.2           | 1222.7     | 824.6***   | 61.8           | 1244.4     | 30.0       |
| Residual            | 30.4           | 562.6      | 58.0       | 28.4           | 649.3      | 58.1       |

\*P<0.05, \*\*P<0.01, \*\*\*P<0.001, T@3pm – Temperature at 3pm, T@9am – Temperature at 9am, RF – Rainfall, RH2M – Relative humidity at 2 meters, RH@3pm – Relative humidity at 3pm, RH@9am – Relative humidity at 9am, Sol. Rad. – Solar radiation, T2MMax – Maximum temperature at 2 meters, T2MMin – Minimum temperature at 2 meters, T2MRNG – Temperature range at 2 meters, T2M – Average temperature at 2 meters, TS – Earth skin temperature, and DAP – days after pollination

**Table S13.** Accumulated analysis of variance mean squares of a multiple linear regression with bunch size as groups of seed set adjusted to 100 fruits per bunch regressed on weather attributes 75 and 90 days after pollination for ‘Enzirabahima,’ ‘Mshale’ and ‘Nshonowa’ pollinated with ‘Calcutta 4’ between January 2016 and January 2019

| Change              | 75 DAP         |            |            | 90 DAP         |            |            |
|---------------------|----------------|------------|------------|----------------|------------|------------|
|                     | ‘Enzirabahima’ | ‘Mshale’   | ‘Nshonowa’ | ‘Enzirabahima’ | ‘Mshale’   | ‘Nshonowa’ |
| T@3PM               | 26.9           | 521.3      | 19.3       | 22.1           | 10.2       | 8.8        |
| T@9AM               | 179.9*         | 15357.6*** | 1761.4***  | 139.7          | 121.3      | 482.9***   |
| RF                  | 10.3           | 2830.8     | 477.9**    | 56.7           | 6397.1**   | 68.2       |
| RH2M                | 32.7           | 639.6      | 870.4***   | 8.1            | 1951.1     | 530.5***   |
| RH@3PM              | 64.8           | 8452.5**   | 36.6       | 186.2*         | 586.1      | 0.3        |
| RH@9AM              | 0.1            | 966.2      | 33.9       | 10.6           | 1698.7     | 273.8*     |
| Sol. Rad.           | 52.6           | 7233.8**   | 1997.4***  | 19.2           | 685.0      | 1848.6***  |
| T2MMax              | 7.5            | 6116.9**   | 51.7       | 188.5*         | 1406.4     | 68.5       |
| T2MMin              | 29.9           | 828.4      | 5.6        | 27.5           | 7468.3***  | 201.4*     |
| T2MN                | 114.9          | 18.8       | 467.0**    | 5.3            | 22.7       | 7.6        |
| T2MRNG              | 32.9           | 1181.7     | 2.9        | 18.5           | 7177.7***  | 25.1       |
| TS                  | 0.1            | 922.6      | 228.7      | 0.2            | 12755.3*** | 2518.2***  |
| Bunch size          | 74.8*          | 2669.3**   | 229.2**    | 55.8           | 3303.1***  | 171.4***   |
| T@3PM.Bunch size    | 12.2           | 5597.9**   | 38.9       | 94.7*          | 1275.8     | 219.3**    |
| T@9AM.Bunch size    | 87.2*          | 3326.7*    | 134.4      | 35.8           | 8570.7***  | 83.4       |
| RF.Bunch size       | 10.7           | 3872.4**   | 86.3       | 43.2           | 11968.8*** | 577.7***   |
| RH2M.Bunch size     | 85.4*          | 5386.4**   | 322.2**    | 26.8           | 152.9      | 96.5       |
| RH@3PM.Bunch size   | 29.3           | 1945.1     | 280.9**    | 62.3           | 868.9      | 49.5       |
| RH@9AM.Bunch size   | 40.6           | 6910.5***  | 204.4*     | 37.3           | 8172.5***  | 50.6       |
| Sol. Rad.Bunch size | 66.5           | 741.4      | 22.0       | 83.5*          | 503.3      | 68.8       |
| T2MMax.Bunch size   | 16.1           | 653.0      | 72.3       | 28.0           | 3627.5**   | 100.3      |
| T2MMin.Bunch size   | 6.3            | 1391.6     | 472.0***   | 4.5            | 938.5      | 214.2**    |
| T2MN.Bunch size     | 95.7*          | 716.7      | 110.2      | 4.3            | 43.9       | 31.2       |
| T2MRNG.Bunch size   | 45.4           | 66.0       | 345.6**    | 37.9           | 198.1      | 1586.4***  |
| TS.Bunch size       | 23.8           | 1803.0     | 721.9***   | 0.3            | 820.8      | 160.8*     |
| Residual            | 30.3           | 710.5      | 58.6       | 30.4           | 550.4      | 35.9       |

\*P<0.05, \*\*P<0.01, \*\*\*P<0.001, T@3pm – Temperature at 3pm, T@9am – Temperature at 9am, RF – Rainfall, RH2M – Relative humidity at 2 meters, RH@3pm – Relative humidity at 3pm, RH@9am – Relative humidity at 9am, Sol. Rad. – Solar radiation, T2MMax – Maximum temperature at 2 meters, T2MMin – Minimum temperature at 2 meters, T2MRNG – Temperature range at 2 meters, T2M – Average temperature at 2 meters, TS – Earth skin temperature, and DAP – days after pollination

**Table S14.** Accumulated analysis of variance mean squares of a multiple linear regression with bunch size as groups of seed set adjusted to 100 fruits per bunch regressed on weather attributes 105 and 120 days after pollination for ‘Mshale’ and ‘Nshonowa’ pollinated with ‘Calcutta 4’ between January 2016 and January 2019

| Change              | 105 DAP     |            | 120 DAP     |            |
|---------------------|-------------|------------|-------------|------------|
|                     | ‘Mshale’    | ‘Nshonowa’ | ‘Mshale’    | ‘Nshonowa’ |
| T@3PM               | 3,519.0*    | 326.1      | 4,522.8**   | 103.8      |
| T@9AM               | 4,957.0**   | 477.7      | 4,181.3*    | 1,073.2**  |
| RF                  | 1,331.3     | 623.0      | 1,060.6     | 63.4       |
| RH2M                | 4,299.3**   | 186.2      | 4,440.6**   | 126.7      |
| RH@3PM              | 965.6       | 443.4      | 9.5         | 15.9       |
| RH@9AM              | 1,121.5     | 222.6      | 7,964.1***  | 22.0       |
| Sol. Rad.           | 4,207.9**   | 697.9*     | 5,243.5**   | 2,339.8*** |
| T2MMax              | 14,486.0*** | 2,135.0*** | 362.9       | 118.6      |
| T2MMin              | 1,056.9     | 10.2       | 499.2       | 209.1      |
| T2MN                | 848.5       | 108.5      | 10,094.2*** | 340.4      |
| T2MRNG              | 2,063.4*    | 205.7      | 2,124.5     | 25.0       |
| TS                  | 13,272.5*** | 699.7*     | 13,325.6*** | 506.4*     |
| Bunch size          | 4,094.8***  | 124.2      | 3,201.4***  | 103.7      |
| T@3PM.Bunch size    | 2,040.7*    | 58.0       | 1,457.0     | 46.4       |
| T@9AM.Bunch size    | 4,086.6***  | 114.5      | 1,452.5     | 61.1       |
| RF.Bunch size       | 553.0       | 230.8      | 888.3       | 66.5       |
| RH2M.Bunch size     | 8,177.0***  | 37.7       | 16,004.6*** | 52.2       |
| RH@3PM.Bunch size   | 1,947.8*    | 195.3      | 269.0       | 157.6      |
| RH@9AM.Bunch size   | 5,620.9***  | 69.5       | 5,088.5***  | 115.2      |
| Sol. Rad.Bunch size | 1,508.0*    | 112.6      | 3,494.8**   | 139.0      |
| T2MMax.Bunch size   | 4,300.4***  | 822.1**    | 151.6       | 201.2      |
| T2MMin.Bunch size   | 349.9       | 38.9       | 57.1        | 112.5      |
| T2MN.Bunch size     | 1,606.1     | 54.1       | 134.2       | 1,081.4*** |
| T2MRNG.Bunch size   | 23.6        | 208.7      | 56.1        | 245.8      |
| TS.Bunch size       | 16.0        | 138.3      | 1.3         | 883.1***   |
| Residual            | 483.4       | 156.8      | 577.6       | 98.8       |

\*P<0.05, \*\*P<0.01, \*\*\*P<0.001, T@3pm – Temperature at 3pm, T@9am – Temperature at 9am, RF – Rainfall, RH2M – Relative humidity at 2 meters, RH@3pm – Relative humidity at 3pm, RH@9am – Relative humidity at 9am, Sol. Rad. – Solar radiation, T2MMax – Maximum temperature at 2 meters, T2MMin – Minimum temperature at 2 meters, T2MRNG – Temperature range at 2 meters, T2M – Average temperature at 2 meters, TS – Earth skin temperature, and DAP – days after pollination

**Table S15.** Accumulated analysis of variance degrees of freedom of a multiple linear regression with bunch size as groups of seed set adjusted to 100 fruits per bunch regressed on weather attributes 105 days before pollination and 120 days after pollination at 15 day intervals for ‘Enzirabahima,’ ‘Mshale’ and ‘Nshonowa’ pollinated with ‘Calcutta 4’ between January 2016 and January 2019

| Change              | 105 DBP – 75 DAP |          |            | 90 – 120 DAP   |          |            |
|---------------------|------------------|----------|------------|----------------|----------|------------|
|                     | ‘Enzirabahima’   | ‘Mshale’ | ‘Nshonowa’ | ‘Enzirabahima’ | ‘Mshale’ | ‘Nshonowa’ |
| T@3PM               | 1                | 1        | 1          | 1              | 1        | 1          |
| T@9AM               | 1                | 1        | 1          | 1              | 1        | 1          |
| RF                  | 1                | 1        | 1          | 1              | 1        | 1          |
| RH2M                | 1                | 1        | 1          | 1              | 1        | 1          |
| RH@3PM              | 1                | 1        | 1          | 1              | 1        | 1          |
| RH@9AM              | 1                | 1        | 1          | 1              | 1        | 1          |
| Sol. Rad.           | 1                | 1        | 1          | 1              | 1        | 1          |
| T2MMax              | 1                | 1        | 1          | 1              | 1        | 1          |
| T2MMin              | 1                | 1        | 1          | 1              | 1        | 1          |
| T2MRNG              | 1                | 1        | 1          | 1              | 1        | 1          |
| T2M                 | 1                | 1        | 1          | 1              | 1        | 1          |
| TS                  | 1                | 1        | 1          | 1              | 1        | 1          |
| Bunch size          | 4                | 5        | 6          | 4              | 5        | 6          |
| T@3PM.Bunch size    | 4                | 2        | 5          | 4              | 2        | 4          |
| T@9AM.Bunch size    | 4                | 2        | 5          | 3              | 2        | 3          |
| RF.Bunch size       | 4                | 2        | 4          | 3              | 2        | 3          |
| RH2M.Bunch size     | 4                | 2        | 4          | 4              | 2        | 4          |
| RH@3PM.Bunch size   | 3                | 2        | 3          | 4              | 4        | 6          |
| RH@9AM.Bunch size   | 3                | 2        | 3          | 4              | 2        | 5          |
| Sol. Rad.Bunch size | 4                | 4        | 6          | 4              | 2        | 4          |
| T2MMax.Bunch size   | 3                | 2        | 3          | 3              | 2        | 3          |
| T2MMin.Bunch size   | 3                | 1        | 3          | 3              | 2        | 3          |
| T2MRNG.Bunch size   | 3                | 1        | 3          | 2              | 1        | 3          |
| T2M.Bunch size      | 3                | 2        | 3          | 3              | 1        | 3          |
| TS.Bunch size       | 2                | 1        | 3          | 2              | 1        | 3          |
| Residual            | 114              | 49       | 35         | 100            | 40       | 29         |

T@3pm – Temperature at 3pm, T@9am – Temperature at 9am, RF – Rainfall, RH2M – Relative humidity at 2 meters, RH@3pm – Relative humidity at 3pm, RH@9am – Relative humidity at 9am, Sol. Rad. – Solar radiation, T2MMax – Maximum temperature at 2 meters, T2MMin – Minimum temperature at 2 meters, T2MRNG – Temperature range at 2 meters, T2M – Average temperature at 2 meters, TS – Earth skin temperature, and DAP – days after pollination
